# Supplementary material for: Evaluation of Patient-Reported Delays and Affordability-Related Barriers to Care in Head and Neck Cancer
Source: PubMed Central journal article supplement — OTO Open. 2021 Dec 12;5(4):2473974X211065358. doi: 10.1177/2473974X211065358 (PMC8671675; doi:10.1177/2473974x211065358), 2021-12-12
Supplement: sj-pdf-1-opn-10.1177_2473974X211065358.pdf [file sj-pdf-1-opn-10.1177_2473974X211065358.pdf]

5. Have you delayed getting care for any of the following reasons in the **past year**?

- a. You couldn't get through on the telephone. ....  Y       N  
Yes      No
- b. You couldn't get an appointment soon enough.....  Y       N  
Yes      No
- c. Once you got there, you had to wait too long to see the doctor.....  Y       N  
Yes      No
- d. The clinic or doctor's office wasn't open when you could get there.....  Y       N  
Yes      No
- e. You didn't have transportation.....  Y       N  
Yes      No
- f. You or a family member could not afford to take time off of work.....  Y       N  
Yes      No
- g. You did not have childcare.....  Y       N  
Yes      No
- h. Another family member was ill. (spouse, child, parent).....  Y       N  
Yes      No
- i. You couldn't communicate with the office or doctor because of speech, hearing or language problems. ....  Y       N  
Yes      No
- j. You could not afford the gas or other travel expenses.....  Y       N  
Yes      No
- k. You did not know where to get the help you needed. ....  Y       N  
Yes      No
- l. The doctor or clinic did not take your insurance. ....  Y       N  
Yes      No
- m. You did not have health insurance. ....  Y       N  
Yes      No
- n. You did not have the money you needed to pay expenses. ....  Y       N  
Yes      No
- o. You found it difficult to park and/or find your way to the clinic or office. ....  Y       N  
Yes      No

During the **past year**, was there any time when you needed any of the following, but didn't get it because you couldn't afford it?

- 6a. Prescription medicines.....  Y       N  
Yes      No
- 6b. Mental health care or counseling.....  Y       N  
Yes      No
- 6c. Dental care, including check-ups.....  Y       N  
Yes      No
- 6d. Doctor's visit. ....  Y       N  
Yes      No
- 6e. X-ray or other test. ....  Y       N  
Yes      No
- 6f. Bandage, brace, or other medical supply. ....  Y       N  
Yes      No
- 6g. Over-the-counter medicine.....  Y       N  
Yes      No

7. How did you usually get to UNC Hospitals or Clinics?.....  A-E
- Public transportation .....A
  - Drove yourself.....B
  - Family member or friend drove you.....C
  - Taxi.....D
  - Other.....E
  - Other Specify: \_\_\_\_\_

8. About how many miles away was UNC Hospitals or Clinics?.....    1-999

9. How long did it take you to get to UNC Hospitals or Clinics?  
Enter the time: .....   0-60

Enter unit: .....  M, H

- Minutes .....M
- Hours .....H
